# Supplementary material for: Higher postoperative plasma EV PD-L1 predicts poor survival in patients with gastric cancer
Source: HighWire-hosted journal article supplement (doi:10.1136/jitc-2020-002218), 2021-03-01
Supplement: jitc-2020-002218supp010_data_supplement.pdf [file jitc-2020-002218supp010_data_supplement.pdf]

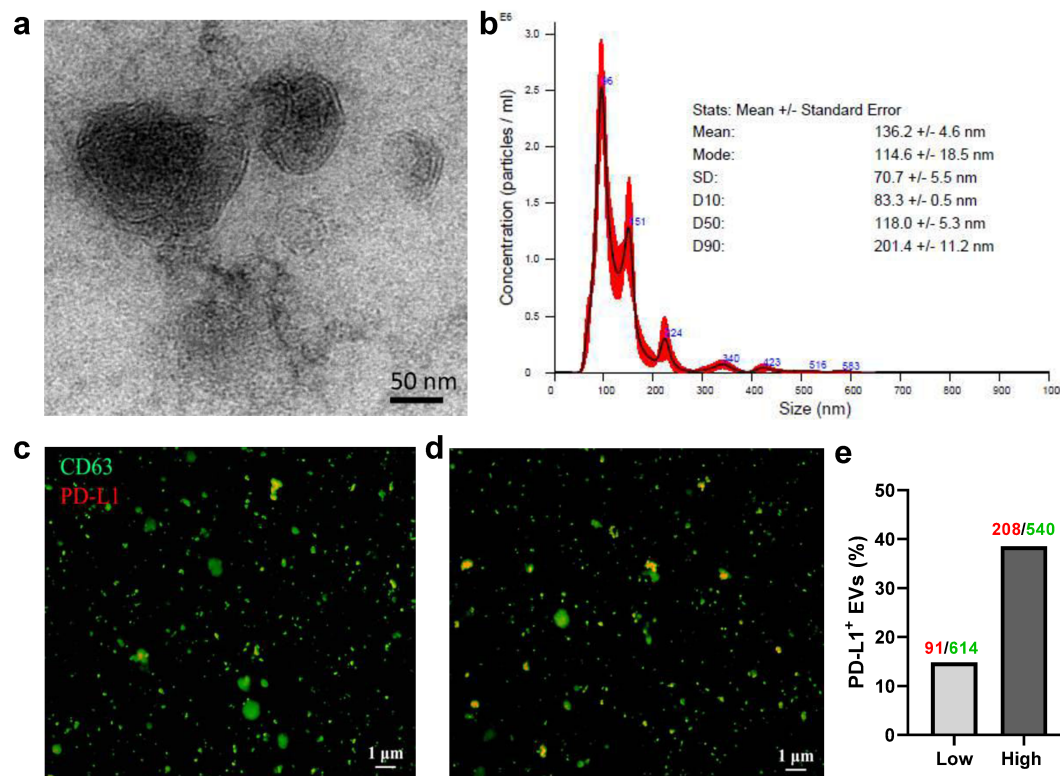

Supplementary Figure 1:

Plasma extracellular vesicular (EV) and EV PD-L1 characterization. Plasma EVs were isolated using the Total Exosome Isolation Kit. Representative transmission electron microscope image of EV (a) and representative results of nanoparticle tracking analysis (b) were shown. The platelet-free plasma with low (c) and high (d) ePD-L1 expression was centrifuged at  $2,500 \times g$  for 10 min at room temperature, the supernatant was stained with the FITC-anti-CD63 (10  $\mu\text{g/ml}$ ) and PerCP-anti-PD-L1 (10  $\mu\text{g/ml}$ ) for 2 h at room temperature. The stained EVs were purified using Total Exosome Isolation Kit and smeared on glass slide. A laser-scanning confocal microscope (TCS SP8 STED, Leica, magnification  $63\times 10$ ) was used to visualize the stained EVs. The number of CD63 or PD-L1 positive EVs was analyzed through ImageJ software, and the ratio of PD-L1 positive EVs in CD63 positive EVs were shown (e).
